# Supplementary material for: Disrupting Circadian Rhythm via the PER1–HK2 Axis Reverses Trastuzumab Resistance in Gastric Cancer
Source: PubMed Central journal article supplement — Cancer Res. 2022 Mar 7;82(8):1503–17. doi: 10.1158/0008-5472.CAN-21-1820 (PMC9662874; doi:10.1158/0008-5472.can-21-1820), 2022-03-07
Supplement: can-21-1820_supplementary_figures_suppsf1-5.pdf [file can-21-1820_supplementary_figures_suppsf1-5.pdf]

## Supplemental figures and figure legends

### Supplementary Fig. S1

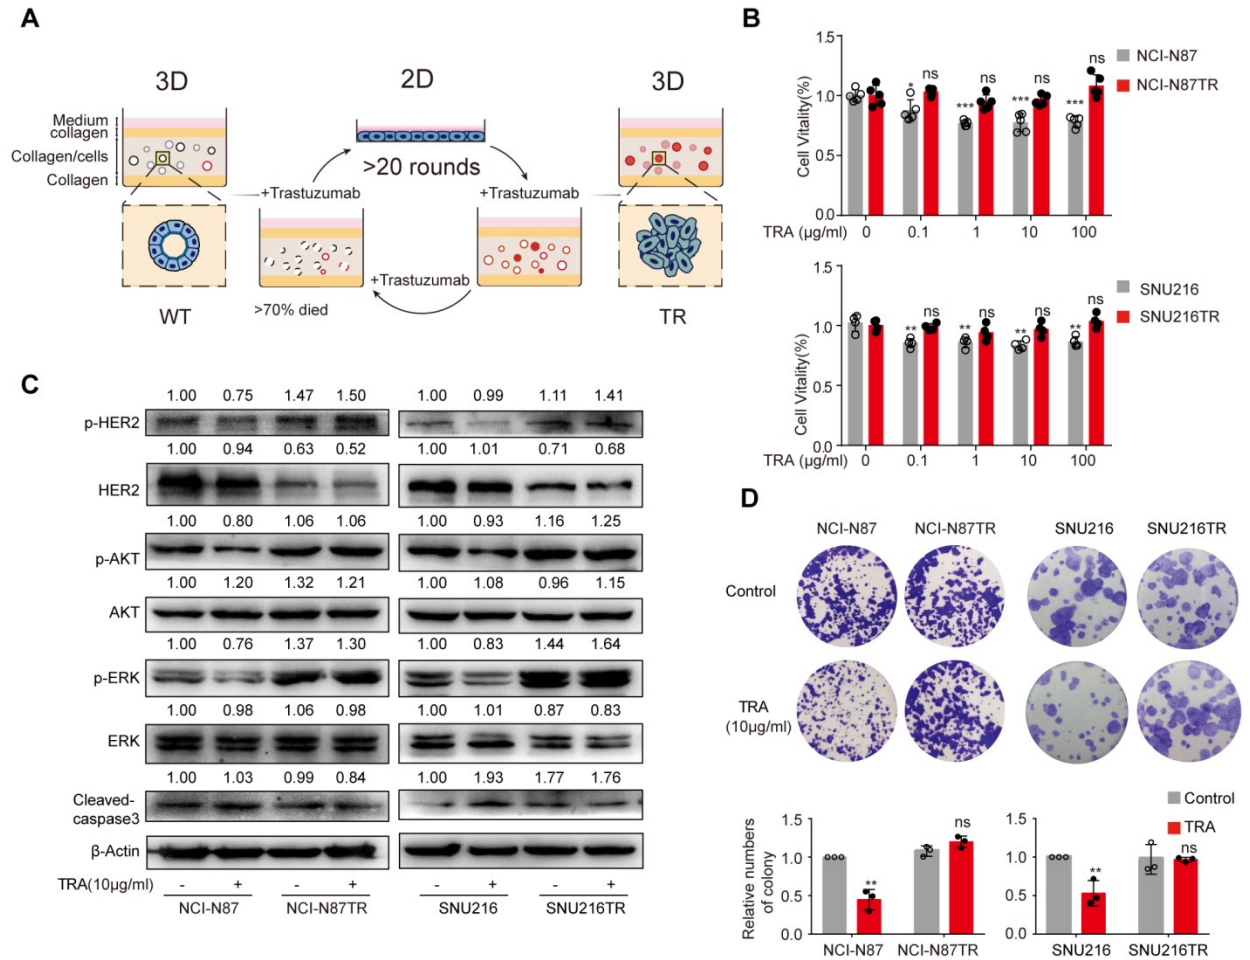

**Fig. S1. Establishment and characterization of trastuzumab-resistant cell lines. (A)**

Schematic of experimental approach to establish trastuzumab-resistant (TR) cells in 3D culture system. In the presence of trastuzumab (10 µg/ml) in 3D type-1 collagen culture media, greater than 70% of colonies died. Residual colonies were isolated and iteratively passaged in 2D and 3D culture in the continued stimulation of trastuzumab over approximately 20 rounds. **(B)** MTT was used to evaluate growth inhibition of WT and TR cells treated with trastuzumab at the gradient concentrations for 4 d (n=4). **(C)** WB analysis of WT and TR cells exposed to trastuzumab (TRA, 10 µg/ml) for 48 h. β-Actin served as the loading control. **(D)** Colony-formation assay and the quantitative graph of WT and TR cells exposed to trastuzumab (TRA, 10 µg/ml) for 2 weeks. Representative images (upper) and the quantification (lower) of numbers of

colonies is are shown (n=3). Student's t-test was performed in (B) and (D). Data are presented as mean  $\pm$  SD. \*\*\*  $P < 0.001$ , \*\*  $P < 0.01$ , \*  $P < 0.05$ , ns  $P > 0.05$ .

Supplementary Fig. S2

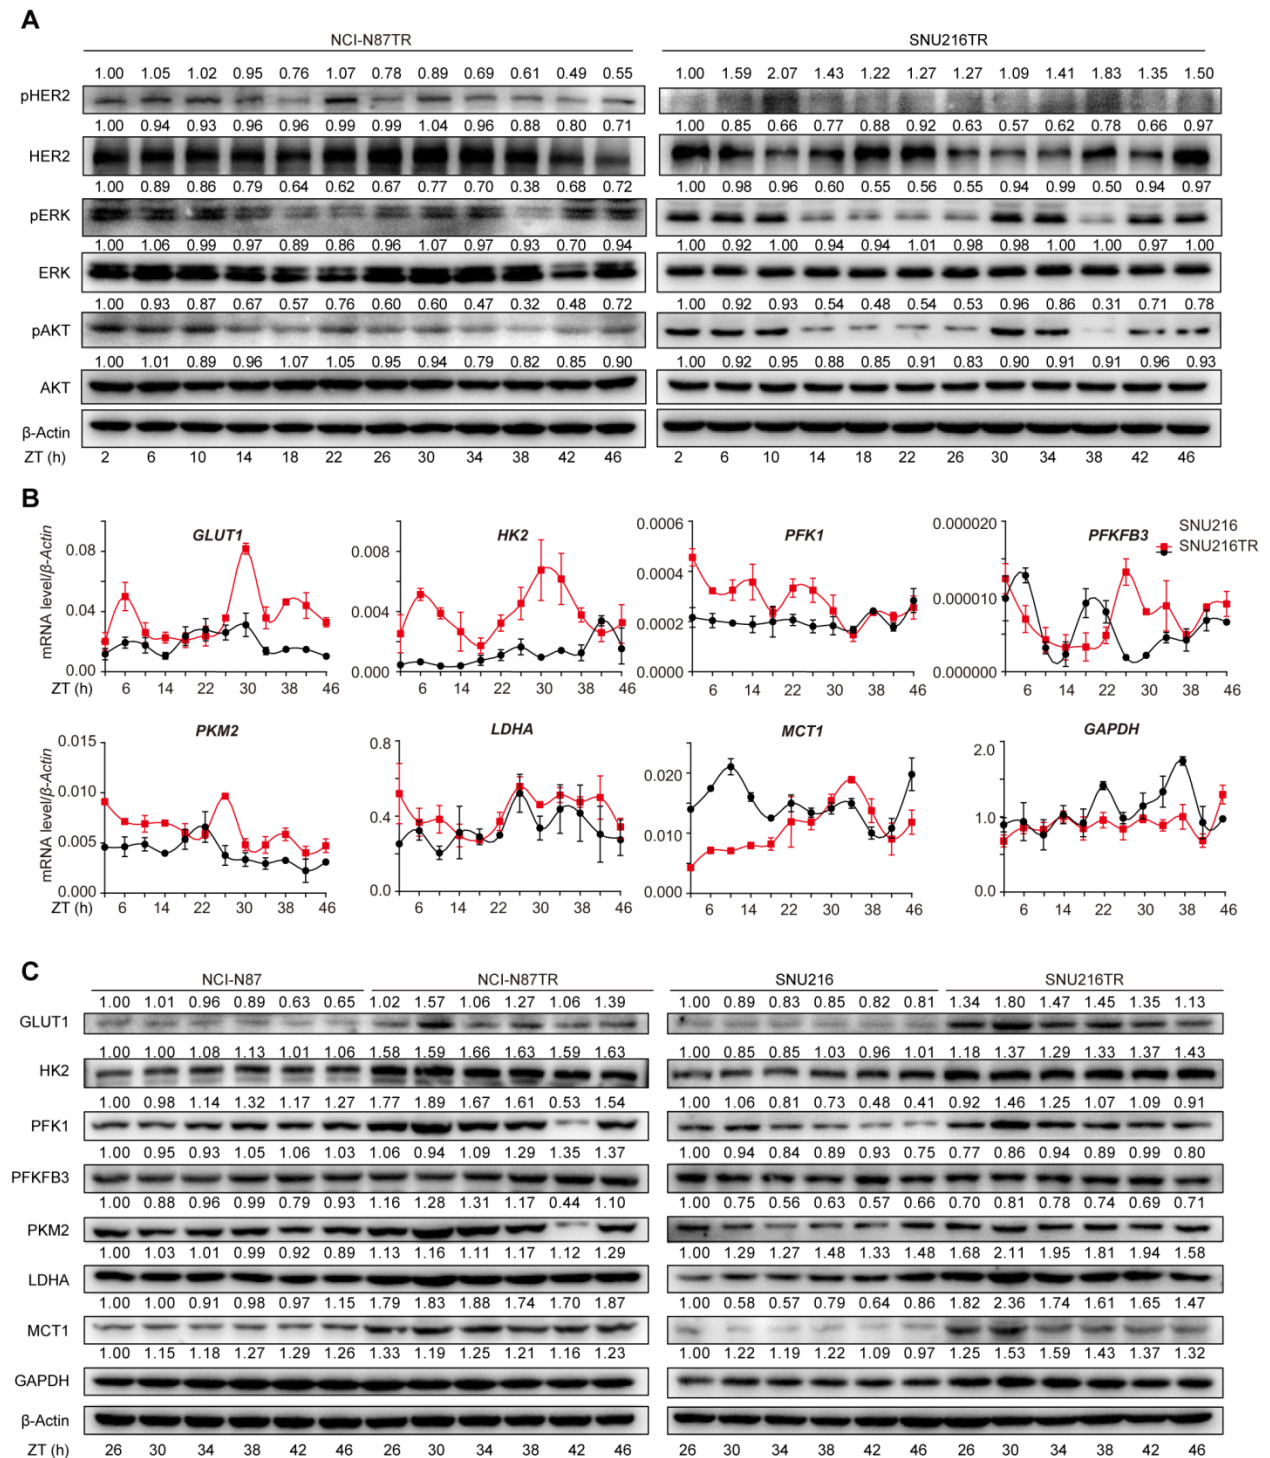

**Fig. S2. The circadian rhythms of ERBB2 pathway proteins and glycolysis-related genes in trastuzumab-resistant HER2-positive gastric cancer. (A) WB analysis of time-series (every 4h) expression on pHER2, HER2, AKT, pAKT, ERK, pERK in synchronized TR cells. (B)**

Quantitative PCR of glycolysis-related genes in synchronized SNU216 and SNU216TR cells at indicative ZTs (n=3). (C) WB analysis of glycolysis-related genes in WT and TR cells at the indicated ZT26 to ZT46.  $\beta$ -Actin serves as the loading control.

### Supplementary Fig. S3

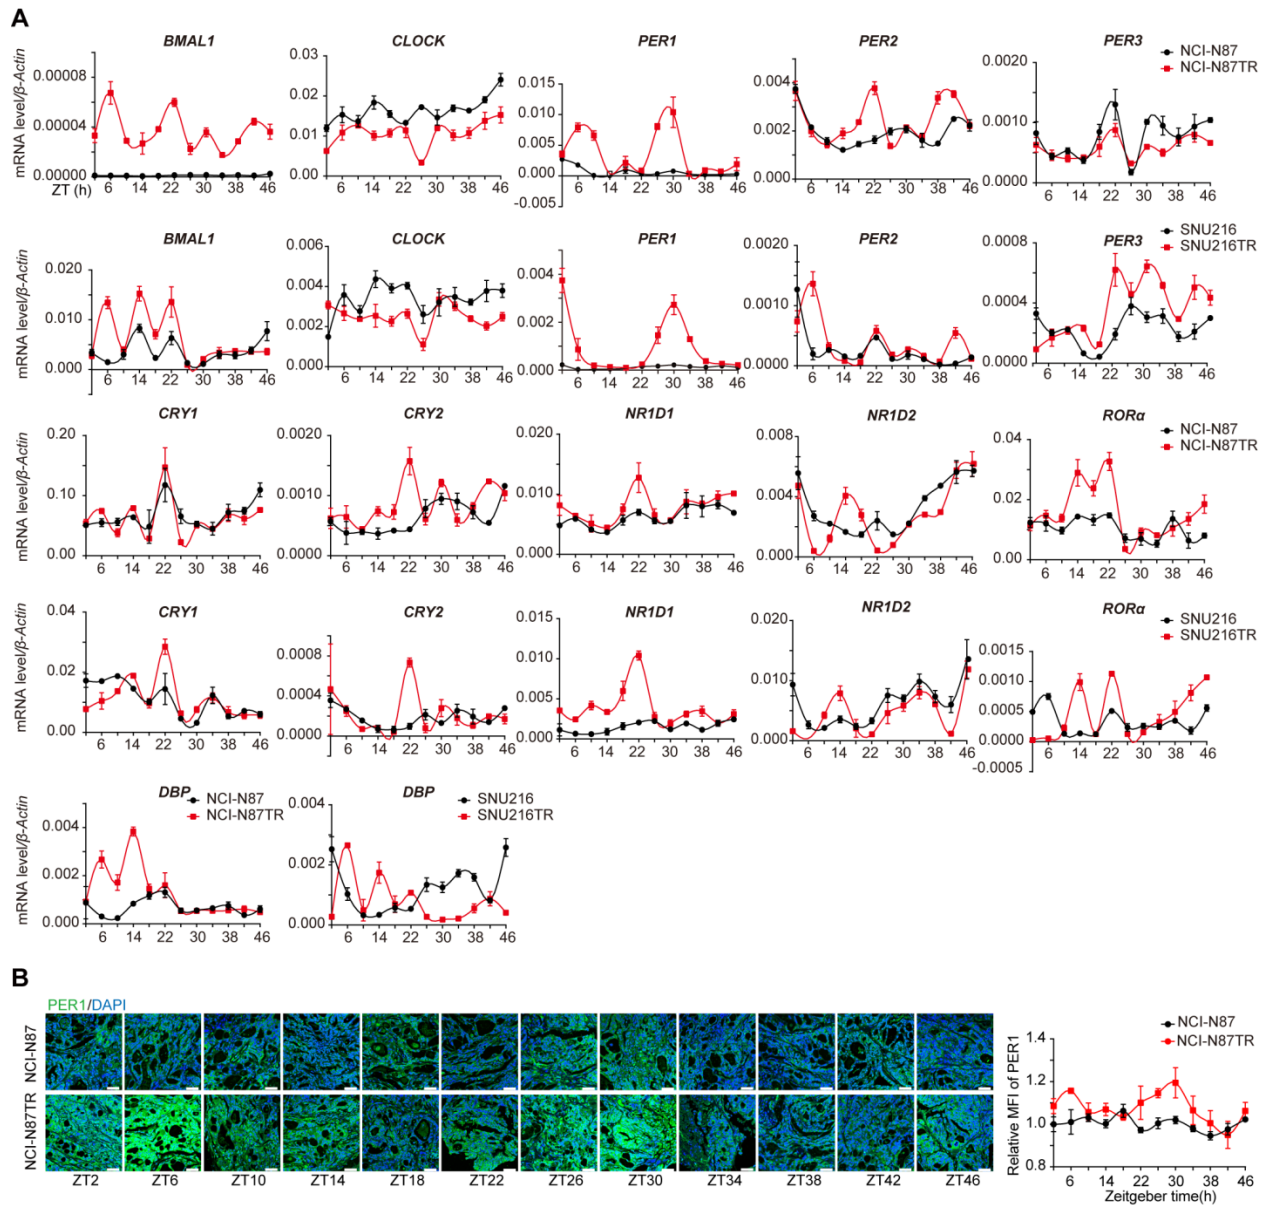

**Fig. S3. Screening of core clock genes in trastuzumab-resistant cells. (A)** Quantitative PCR of core clock genes in WT and TR cells synchronized with dexamethasone (n=3). **(B)** Immunofluorescence analysis for PER1 expression in WT and TR tumor tissues. Representative IF images (left) and the quantification (right) of mean fluorescence intensity (MFI) were shown (n=4). Scale bar: 50  $\mu$ m.

Supplementary Fig. S4

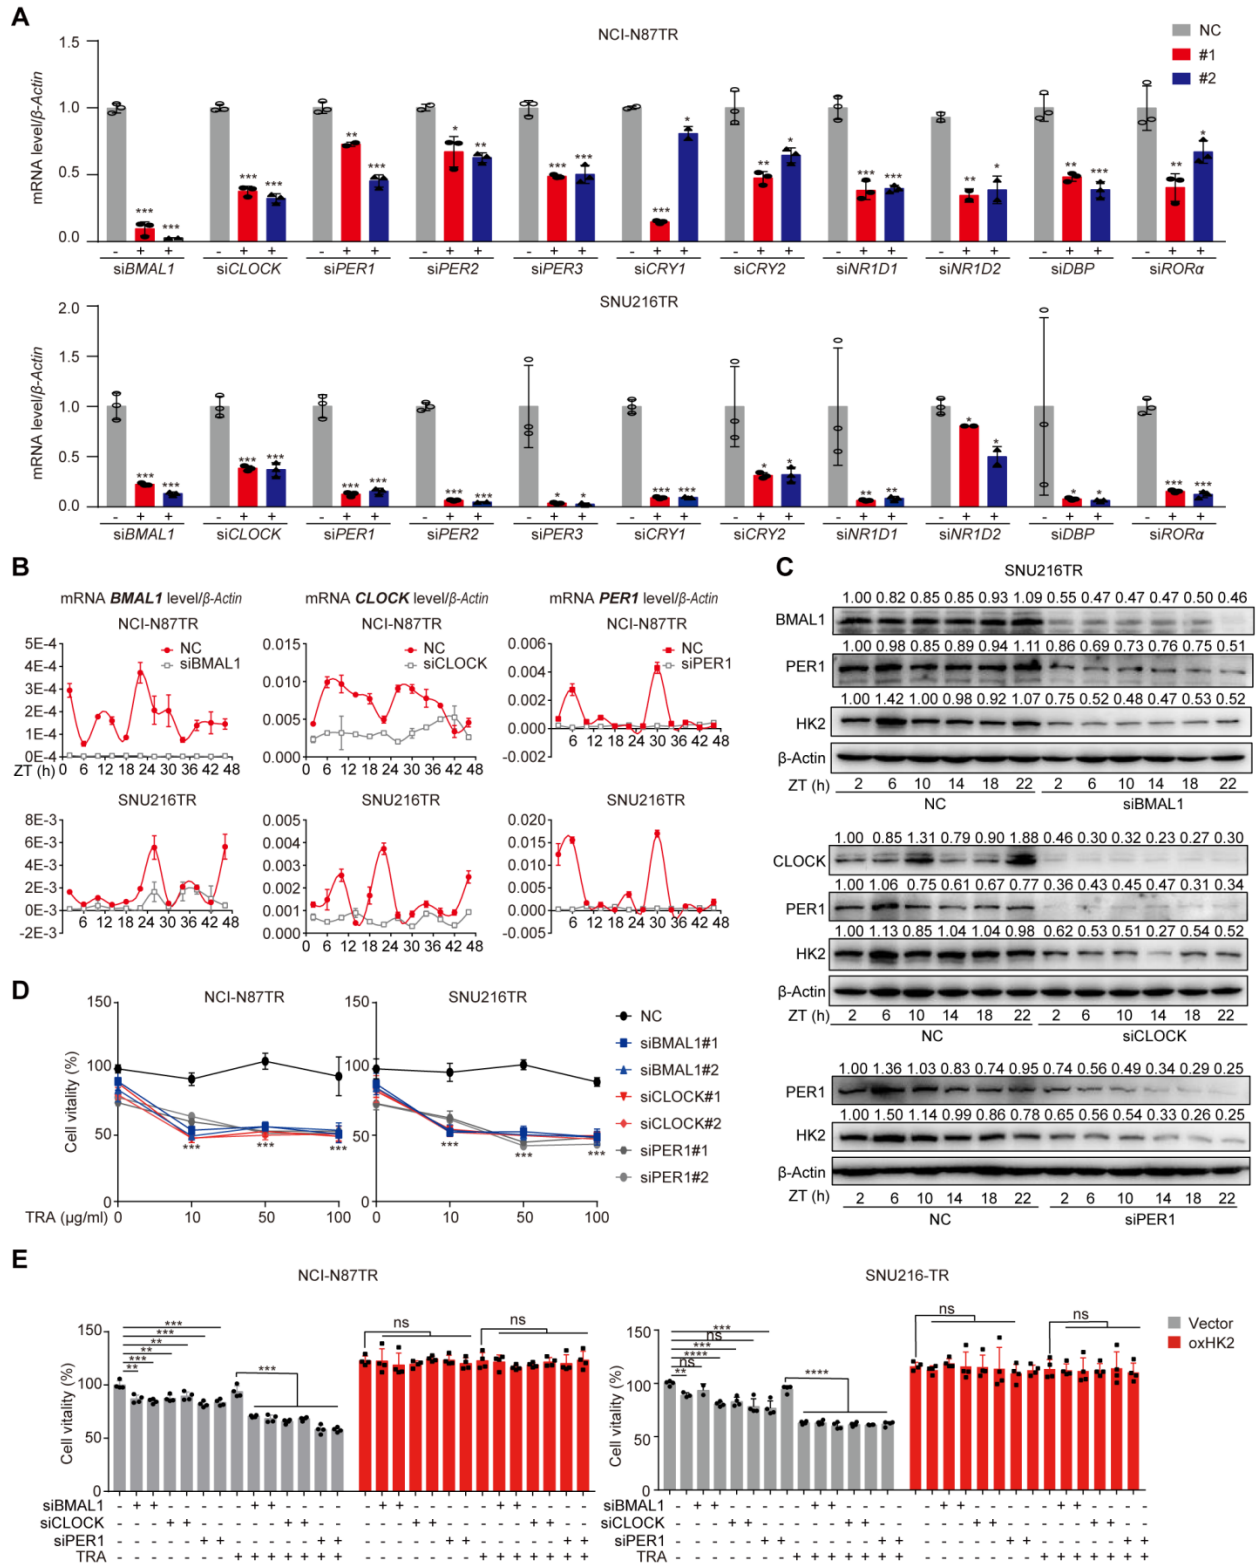

**Fig. S4. BMAL1-CLOCK-PER1 axis triggered trastuzumab resistance via regulating of HK2 circadian oscillation in TR cells. (A) Quantitative PCR of mRNA levels for core clock**

genes in TR cells transfected with or without targeting siRNA (n=3). **(B)** Quantitative PCR of mRNA levels of *BMAL1*, *CLOCK* and *PER1* in synchronized TR cells transfected with target siRNAs (n=3). **(C)** WB analysis of PER1 and HK2 proteins in synchronized SNU216TR cells infected with siRNA of *BMAL1*, *CLOCK* and *PER1*. **(D)** Growth inhibition of TR cells treated with trastuzumab at the gradient concentrations after knockdown with siRNA of *BMAL1*, *CLOCK* and *PER1* (n=4). **(E)** MTT was used to assess cell viability of TR cells treated with trastuzumab (TRA, 10 µg/ml) after transfection with siRNA of *BMAL1*, *CLOCK* and *PER1* with or without overexpressing *HK2*. Student's t-test was performed in (A), (D) and (E). Data are presented as mean ± SD. \*\*\*  $P < 0.001$ , \*\*  $P < 0.01$ , \*  $P < 0.05$ , ns  $P > 0.05$ .

## Supplementary Fig. S5

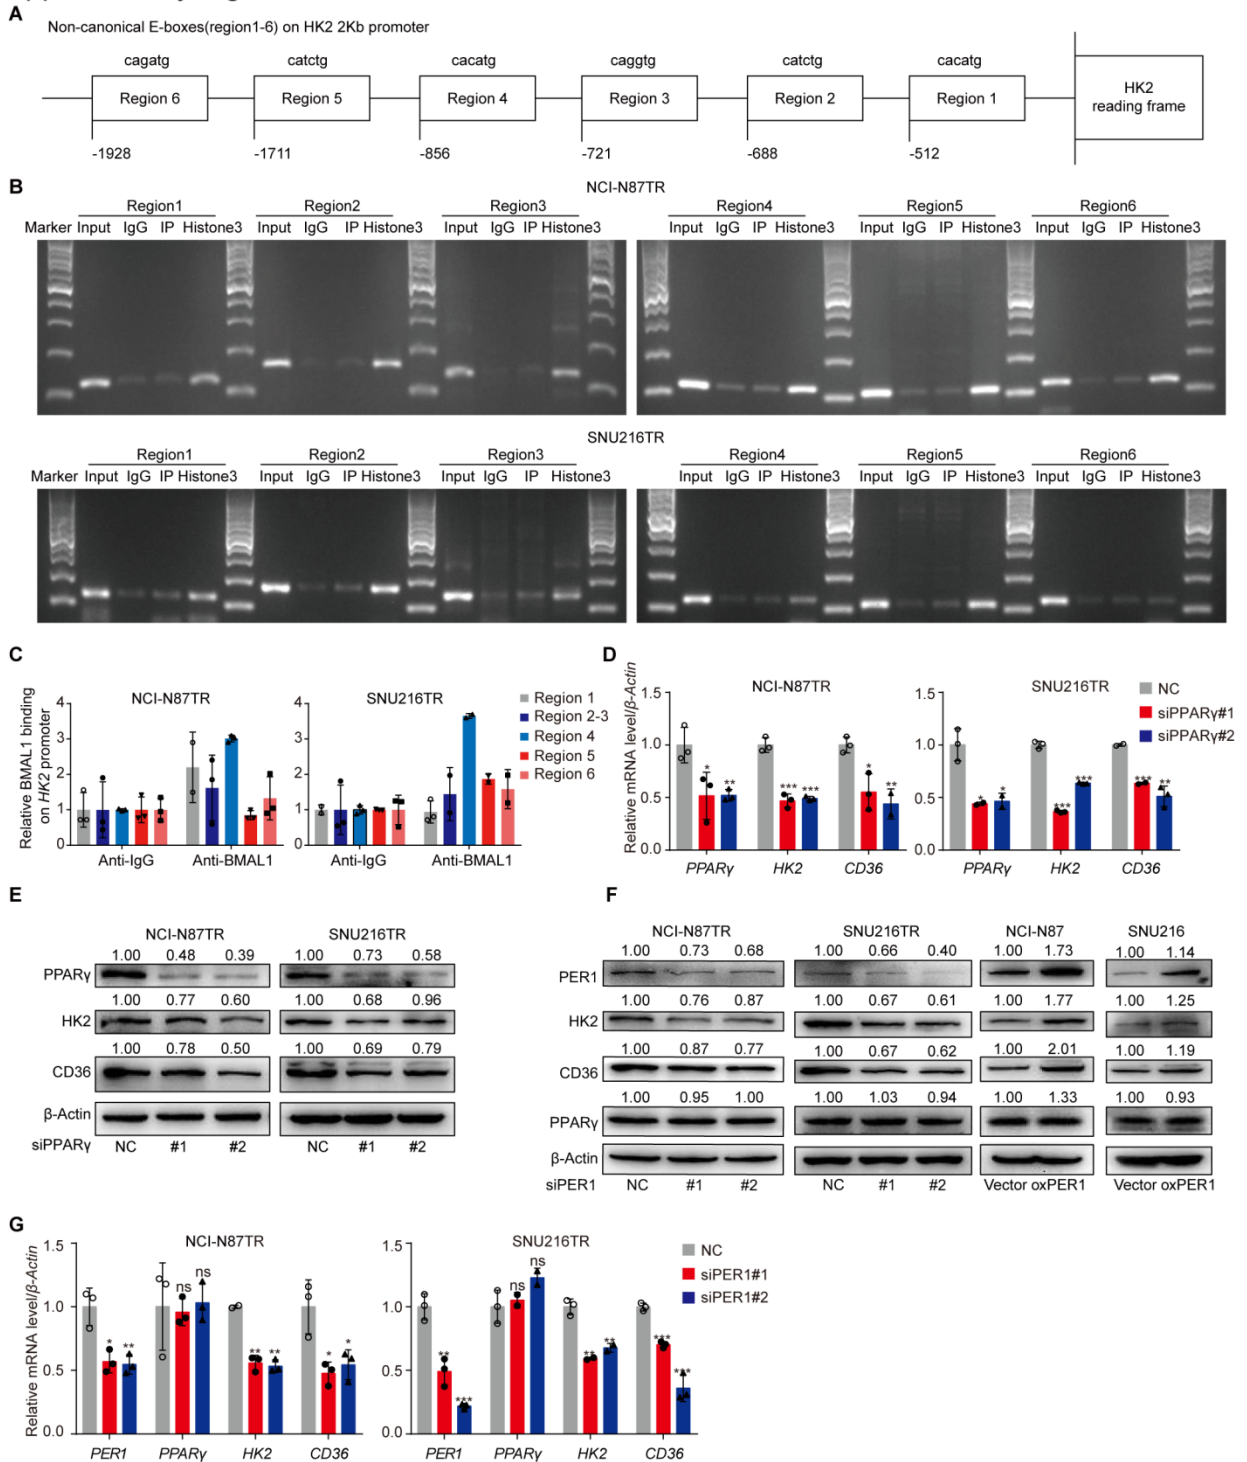

**Fig. S5. PER1 interacts with PPAR $\gamma$  to enhance transcript regulation of HK2.** (A) Schematic representation of non-canonical E-boxes (region1-6) on the HK2 promoter domains. (B-C) Gel electrophoresis (B) and quantitative PCR (C) of immunoprecipitated DNA with specific primers for the E-box locus region of HK2 by ChIP assay in TR cells. Input: DNA



fragments without any specificity antibody in cells; IP: DNA fragments precipitated by BMAL1 antibody; IgG: DNA fragments precipitated by IgG antibody served as negative control; Histone3: DNA fragments precipitated by Histone3 antibody served as positive control. **(D-E)** Quantitative PCR **(D)** and WB analysis **(E)** of PPAR $\gamma$ , HK2 and CD36 in TR cells infected with siRNA of PPAR $\gamma$ . **(F-G)** WB analysis **(F)** and quantitative PCR **(G)** in TR cells infected with siRNA or overexpression of *PER1*. Statistics were calculated with 3 samples in (C), (D) and (G). *P* value was determined by Student's t-test. Data are graphed as the mean  $\pm$  SD, \*\*\* *P*<0.001, \*\* *P*<0.01, \* *P*<0.05, ns *P*>0.05.
