# Supplementary material for: Disrupting Circadian Rhythm via the PER1–HK2 Axis Reverses Trastuzumab Resistance in Gastric Cancer
Source: PubMed Central journal article supplement — Cancer Res. 2022 Mar 7;82(8):1503–17. doi: 10.1158/0008-5472.CAN-21-1820 (PMC9662874; doi:10.1158/0008-5472.can-21-1820), 2022-03-07
Supplement: can-21-1820_supplementary_tables_suppst1-4.pdf [file can-21-1820_supplementary_tables_suppst1-4.pdf]

## Supplemental Tables

**Table S1. Short tandem repeat (STR) analysis for NCI-N87, NCI-N87TR, SNU216 and SNU216TR.**

| STR locus | NCI-N87  |          | NCI-N87TR |          | SNU216   |          | SNU216TR |          |
|-----------|----------|----------|-----------|----------|----------|----------|----------|----------|
|           | Allele 1 | Allele 2 | Allele 1  | Allele 2 | Allele 1 | Allele 2 | Allele 1 | Allele 2 |
| Yindel    | 2        |          | 2         |          | -        |          | -        |          |
| AMEL      | X        | Y        | X         | Y        | X        |          | X        |          |
| D3S1358   | 14       |          | 14        |          | 17       |          | 17       |          |
| D13S317   | 8        | 11       | 8         | 11       | 9        |          | 9        |          |
| D7S820    | 10       | 11       | 10        | 11       | 8        | 10       | 8        | 10       |
| D16S539   | 9        | 13       | 9         | 13       | 10       | 13       | 10       | 13       |
| SE33      | 25.2     | 29.2     | 25.2      | 29.2     | 25.2     |          | 25.2     |          |
| D10S1248  | 13       |          | 13        |          | 13       | 15       | 13       | 15       |
| D5S818    | 12       | 13       | 12        | 13       | 11       |          | 11       |          |
| D21S11    | 30       |          | 30        |          | 30       | 33.2     | 30       | 33.2     |
| TPOX      | 9        | 11       | 9         | 11       | 9        |          | 9        |          |
| D1S1656   | 16       |          | 16        |          | 16       |          | 16       |          |
| D6S1043   | 12       |          | 12        |          | 18       |          | 18       |          |
| DXS6795   | 10       |          | 10        |          | 13       |          | 13       |          |
| D19S433   | 14       | 14.2     | 14        | 14.2     | 15.2     |          | 15.2     |          |
| D22S1045  | 14       | 15       | 14        | 15       | 15       | 17       | 15       |          |
| D8S1179   | 14       |          | 14        |          | 13       | 16       | 13       | 16       |
| Penta E   | 5        |          | 5         |          | 5        |          | 5        |          |
| DYS391    | 10       |          | 10        |          | -        |          | -        |          |
| D2S441    | 11       | 12       | 11        | 12       | 10       |          | 10       |          |
| D12S391   | 16       | 21       | 16        | 21       | 18       |          | 18       |          |
| D2S1338   | 23       | 24       | 23        | 24       | 19       |          | 19       |          |
| vWA       | 15       | 16       | 15        | 16       | 14       | 20       | 14       | 20       |
| Penta D   | 12       |          | 12        |          | 9        | 13       | 9        | 13       |
| TH01      | 9        |          | 9         |          | 7        |          | 7        |          |
| D18S51    | 17       |          | 17        |          | 16       |          | 16       |          |
| CSF1PO    | 8        | 12       | 8         | 12       | 12       |          | 12       |          |
| FGA       | 20       | 21       | 20        | 21       | 21       |          | 21       |          |

**Table S2. Primer of genes for quantitative PCR.**

| Gene                          | Orientation | Sequence (5'-3')            |
|-------------------------------|-------------|-----------------------------|
| <i>BMAL1</i>                  | F           | CAATCCATACACAGAAGCAAAC      |
|                               | R           | CATCTGCTGCCCTGAGAATGA       |
| <i>CLOCK</i>                  | F           | CTCTACTCATCTGCTGGAAAGTG     |
|                               | R           | ATGGCTCCTTTGGGTCTATTG       |
| <i>PER1</i>                   | F           | ACCTCAGCCAGCATCACCC         |
|                               | R           | GAAGAGTCGATGCTGCCAAAG       |
| <i>PER2</i>                   | F           | TGCAGTGGAGCAGATTCTTT        |
|                               | R           | GGTGGTAGCGGATTTTCATTCT      |
| <i>PER3</i>                   | F           | GCCTTACAAGCTGGTTTGC         |
|                               | R           | CTGTGTCTATGGACCGTCCATT      |
| <i>CRY1</i>                   | F           | GCTCTCAAGGGAGTGGTATTT       |
|                               | R           | CTCTTCCTGACTAGGACGTTTC      |
| <i>CRY2</i>                   | F           | GGGTCCGGGTATTTGATGAG        |
|                               | R           | GTGGAAGAAGTCTGGAAGA         |
| <i>NR1D1</i>                  | F           | GCATGGAGAATTCCGCTTC         |
|                               | R           | CGGTTCTTCAGCACCAGAG         |
| <i>NR1D2</i>                  | F           | CATTTCTATATTTGAAAGTAGCCCAAT |
|                               | R           | ACTCAATCAAAGAATGTGCTTGTA    |
| <i>DBP</i>                    | F           | TAGAAGGAGCGCCTTGAGTC        |
|                               | R           | GCAACCCTCCAGTATCCAGA        |
| <i>ROR<math>\alpha</math></i> | F           | AAACAAGCAGCGGGAGGTGA        |
|                               | R           | TGGCAAACCTCCACCACATAC       |
| <i>HK2</i>                    | F           | ATTGTCCAGTGCATCGCGGA        |
|                               | R           | AGGTCAAACCTCCTCTCGCCG       |
| <i>GLUT1</i>                  | F           | CCGCAACGAGGAGAACCG          |
|                               | R           | GTGACCTTCTTCTCCCGCATC       |
| <i>LDHA</i>                   | F           | AGCCCGATTCCGTTACCT          |
|                               | R           | CACCAGCAACATTCATTCCA        |
| <i>PFKFB3</i>                 | F           | CTCGCATCAACAGCTTTGAGG       |

|                                 |   |                         |
|---------------------------------|---|-------------------------|
|                                 | R | TCAGTGTTTCCTGGAGGAGTC   |
|                                 | F | TCTGTACCATTGGCCCAGCTT   |
| <i>PKM2</i>                     | R | TGGCTGTGCGCACATTCTTGA   |
|                                 | F | GGTGCCCGTGTCTTCTTTGT    |
| <i>PFK1</i>                     | R | AAGCATCATCGAAACGCTCTC   |
|                                 | F | ACCCAGAAGACTGTGGATGG    |
| <i>GAPDH</i>                    | R | TCTAGACGGCAGGTCAGGTC    |
|                                 | F | CATGCCACCACCAGCGAAG     |
| <i>MCT1</i>                     | R | TGACAAGCAGCCACCAACAATC  |
|                                 | F | GGCTGTGACCGGAACTGTG     |
| <i>CD36</i>                     | R | AGGTCTCCA ACTGGCATTAGAA |
|                                 | F | GTGCCAGTTTCGATCCGTAGA   |
| <i>PPAR<math>\gamma</math></i>  | R | GGCCAGCATCGTGTAGATGA    |
|                                 | F | CATGTACGTTGCTATCCAGGC   |
| <i><math>\beta</math>-Actin</i> | R | CTCCTTAATGTCACGCACGAT   |

---

**Table S3. Primers of potential E-box regions or binding sites for chromatin immunoprecipitation (ChIP) experiment.**

| Region or sites | Position       | Sequence (5'-3')        |
|-----------------|----------------|-------------------------|
| E-box region1   | F: -564~-583   | ACTTTCCGGCCGTGCTACAA    |
|                 | R: -472~-491   | CCTGTGCGGAGAGACTGT      |
| E-box region2   | F: -746~-766   | TCTCAAGCAACCCTCCAACCT   |
|                 | R: -622~-641   | ACAAGAGTCGGCCCATCCTC    |
| E-box region3   | F: -787~-806   | GGGTCTCACTATGTCGCCCA    |
|                 | R: -685~-706   | AGATGAGGAAATTGAGGCAAGGC |
| E-box region4   | F: -916~-935   | TCATAGCTCACTGCAGCCTC    |
|                 | R: -831~-850   | AAATCAGCCGGACATGGTGG    |
| E-box region5   | F: -1753~-1772 | AAGGAGGGTTGAGGACGTGC    |
|                 | R: -1673~-1692 | CTCCCACTTCAGCGTCCCAA    |
| E-box region6   | F: -1956~-1975 | CCTCAGAGTGGAGCACTGGT    |
|                 | R: -1865~-1885 | CCCTGCCCTTGTCTTACTCCT   |
| Primer-P1       | F: -1979~-1998 | GGGGAGTGAGGTTAGCCAGA    |
|                 | R: -1856~-1875 | TCTTCTCTTCCCTGCCCTTG    |
| Primer-P2       | F: -1856~-1875 | CAAGGGCAGGGAAGAGAAGA    |
|                 | R: -1754~-1773 | CACGTCCTCAACCCTCCTTC    |
| Primer-P3-4     | F: -1091~-1110 | TGGCTCTTAGAGAGGCAGCA    |
|                 | R: -915~-934   | CGAGGCTGCAGTGAGCTATG    |

**Table S4. siRNA sequence.**

| Gene          | Number      | Sequence            |
|---------------|-------------|---------------------|
| BMAL1         | Sequence #1 | TCACCAAGATGACATAGGA |
|               | Sequence #2 | GTCAGAGTTTGTGGACTA  |
| CLOCK         | Sequence #1 | GAGCTCGATTGTTGACAGA |
|               | Sequence #2 | CCAGCAACTTGCACCTATA |
| PER1          | Sequence #1 | CGCTCGCCCTGGCCAATAA |
|               | Sequence #2 | TTATTGGCCAGGGCGAGCG |
| PER2          | Sequence #1 | GCGCTAAGGTCCAGTGATA |
|               | Sequence #2 | GGTCAAACCTCGAGACTCA |
| PER3          | Sequence #1 | GCTCACCTTGCAGTAAA   |
|               | Sequence #2 | GTCTCACTGTGGTTGAAAA |
| CRY1          | Sequence #1 | GATGCAGATTGGAGCATAA |
|               | Sequence #2 | GGATGAAACAGATCTATCA |
| CRY2          | Sequence #1 | GGCTTAACATTGAACGAAT |
|               | Sequence #2 | TGGCGAGAGTTCTTCTACA |
| NR1D1         | Sequence #1 | CATGTCCTATGAACATGTA |
|               | Sequence #2 | GCAACTCAAAGAATGTTCT |
| NR1D2         | Sequence #1 | GAGAACGGATTCCCAAGAA |
|               | Sequence #2 | GATCTTCGATCTTTAAACA |
| DBP           | Sequence #1 | GCGATGTGGAGTACGTAGA |
|               | Sequence #2 | GAGACCTTTGACCCTCGAA |
| ROR $\alpha$  | Sequence #1 | CCCGACGTCTTCAAATCCT |
|               | Sequence #2 | CACGACGACCTCAGTAACT |
| PPAR $\gamma$ | Sequence #1 | AGATAAAGCTTCTGGATTT |
|               | Sequence #2 | AGGAAAGACAACAGACAAA |
